# Supplementary material for: The Glucosylceramide Synthase Inhibitor PDMP Causes Lysosomal Lipid Accumulation and mTOR Inactivation
Source: MDPI journal article supplement (doi:10.3390/ijms22137065), 2021-06-30
Supplement: s1 [file s1]

## Supplementary Materials

Figure S1

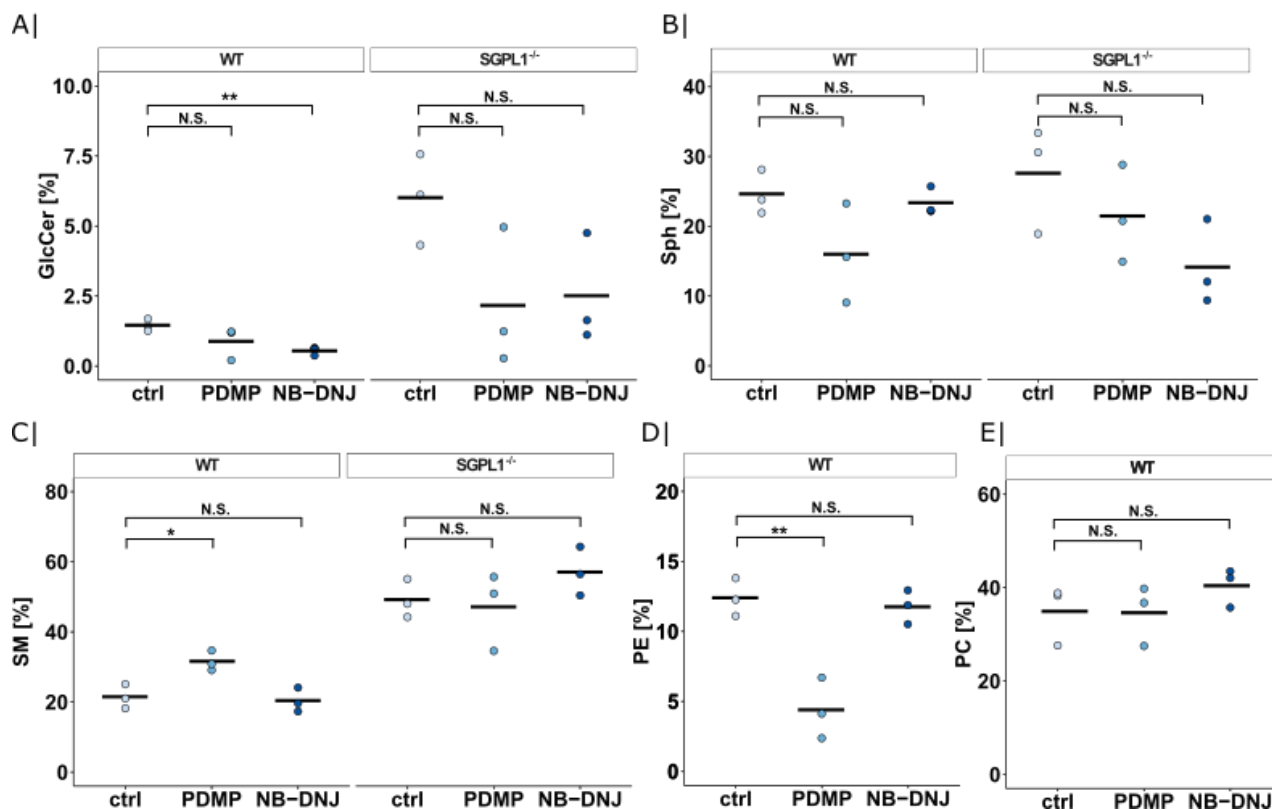

**Figure S1:** Quantification of A| GlcCer, B| Sph C| SM, D| PE and E| PC levels in Fig. 1b. The fluorescent signal corresponding to the respective band was divided by the total intensity of all fluorescently labelled lipids. This was extracted from 3 independent experiments and is presented as dot plot including the calculated mean. Welch two sample t-tests were performed between control and PDMP or NB-DNJ conditions (A| WT ctrl-PDMP: N.S.  $P = 2.2 \times 10^{-1}$ , A| WT ctrl-NB-DNJ: \*\*  $P = 5.4 \times 10^{-3}$ , A| SGPL1<sup>-/-</sup> ctrl-PDMP: N.S.  $P = 9.8 \times 10^{-2}$ , A| SGPL1<sup>-/-</sup> ctrl-NB-DNJ: N.S.  $P = 7.9 \times 10^{-2}$ , B| WT ctrl-PDMP: N.S.  $P = 1.6 \times 10^{-1}$ , B| WT ctrl-NB-DNJ: N.S.  $P = 6.1 \times 10^{-1}$ , B| SGPL1<sup>-/-</sup> ctrl-PDMP: N.S.  $P = 3.6 \times 10^{-1}$ , B| SGPL1<sup>-/-</sup> ctrl-NB-DNJ: N.S.  $P = 7.9 \times 10^{-2}$ , C| WT ctrl-PDMP: \*  $P = 1.9 \times 10^{-2}$ , C| WT ctrl-NB-DNJ: N.S.  $P = 7.2 \times 10^{-1}$ , C| SGPL1<sup>-/-</sup> ctrl-PDMP: N.S.  $P = 7.9 \times 10^{-1}$ , C| SGPL1<sup>-/-</sup> ctrl-NB-DNJ: N.S.  $P = 1.9 \times 10^{-1}$ , D| WT ctrl-PDMP: \*\*  $P = 9.3 \times 10^{-3}$ , D| WT ctrl-NB-DNJ: N.S.  $P = 5.9 \times 10^{-1}$ , E| WT ctrl-PDMP: N.S.  $P = 9.7 \times 10^{-1}$ , E| WT ctrl-NB-DNJ: N.S.  $P = 2.8 \times 10^{-1}$ ).

Figure S2

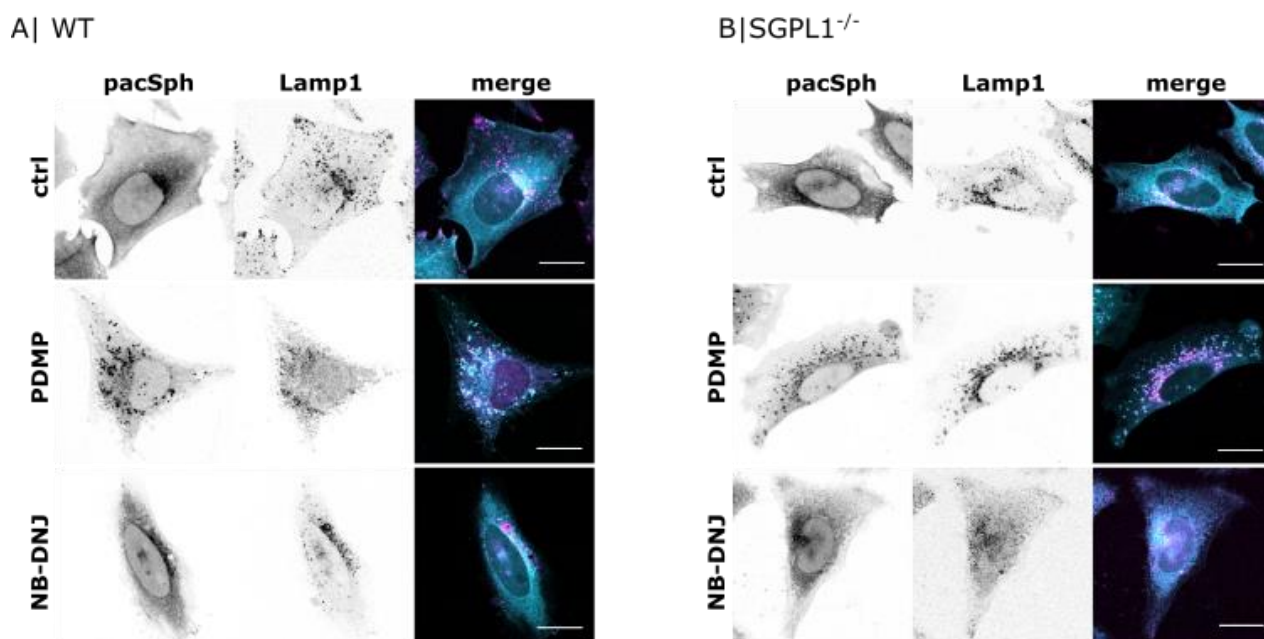

**Figure S2:** Confocal microscopy images of pacSph-derived lipids upon inhibitor treatment. HeLa A | WT and B | SGPL1<sup>-/-</sup> cells were treated with PDMP (20  $\mu$ M) or NB-DNJ (50  $\mu$ M) for 22 h and pulsed with pacSph (2  $\mu$ M for 3 h). PacSph-derived lipids were cross-linked by UV-irradiation and clicked to Alexa555-azide. Co-localization with a lysosomal marker was achieved by immunofluorescence staining using Lamp1 antibody. Scale bar indicates 20  $\mu$ m.

**Figure S3**

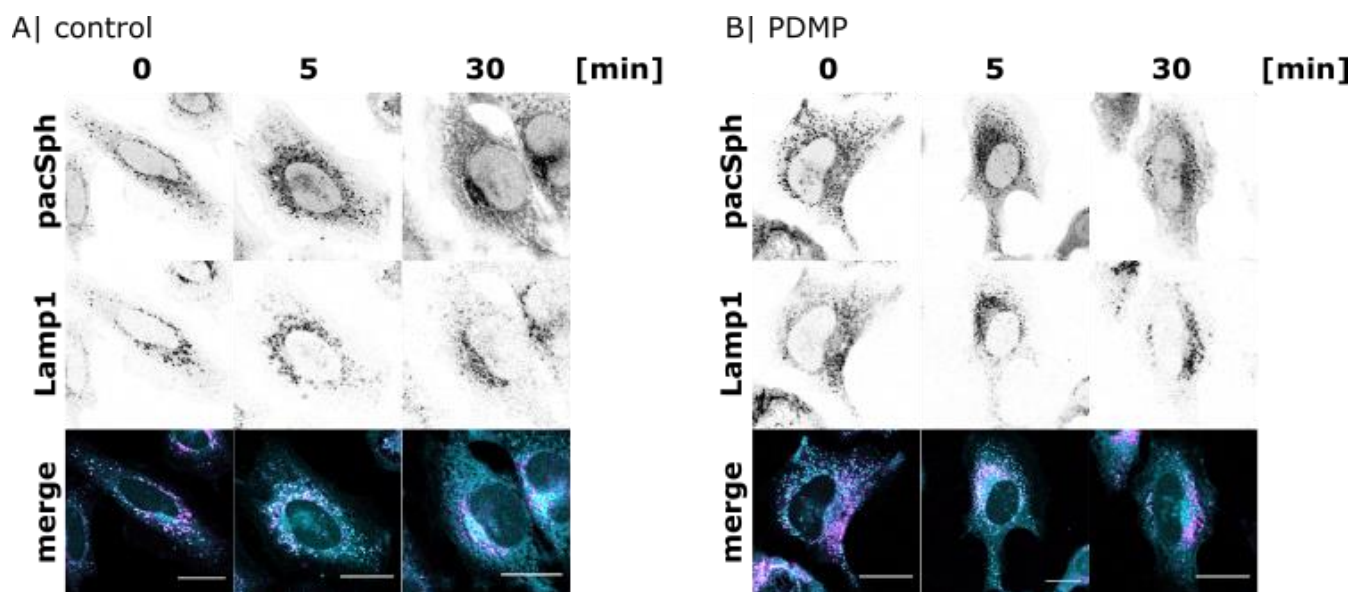

**Figure S3:** Confocal microscopy images of pacSph-derived lipids in short pulse-chase timepoints. HeLa SGPL1<sup>-/-</sup> A | untreated control or B | PDMP (20  $\mu$ M, 22h) treated cells were pulsed for 5 min with pacSph (2  $\mu$ M) and chased for 0, 5 or 30 min in lipid-free medium. Sphingolipids were cross-linked, fixed, and clicked to a fluorophore. Lysosomes were visualized by immunofluorescence staining using Lamp1 antibody. Scale bar indicates 20  $\mu$ m.

**Figure S4**

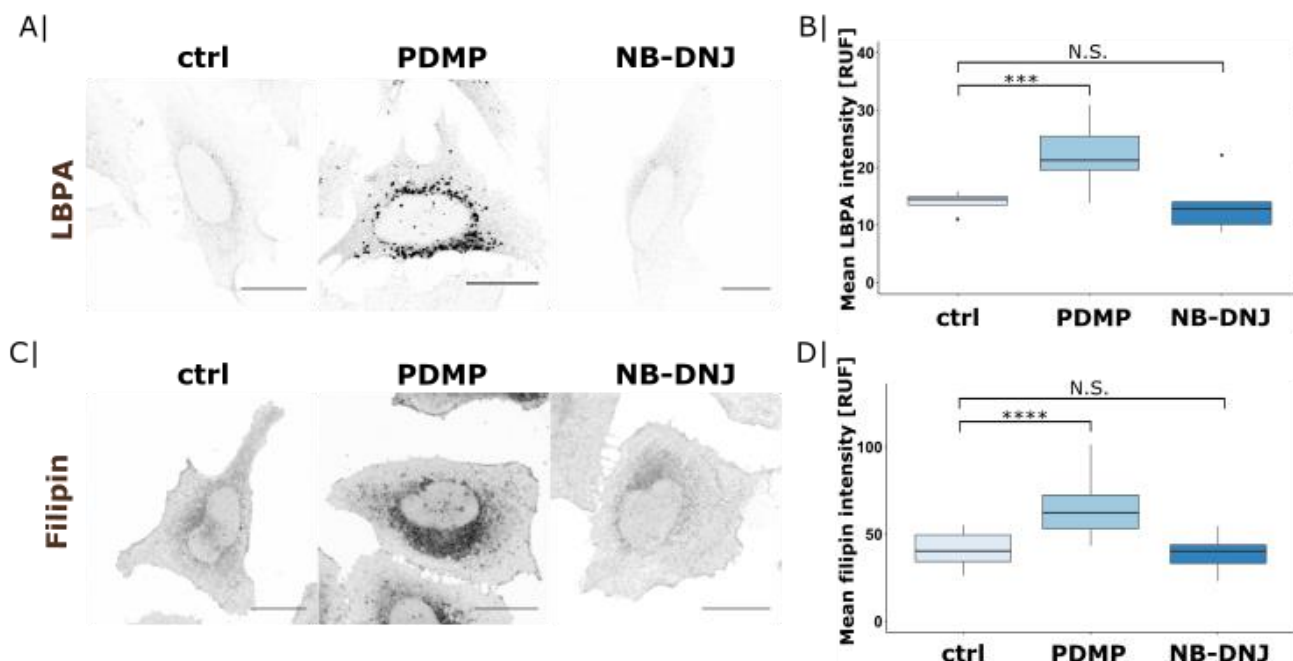

**Figure S4:** Immunofluorescence microscopy images of LBPA and cholesterol. HeLa WT cells treated with PDMP (20  $\mu$ M, 22 h) or NB-DNJ (50  $\mu$ M, 22 h) and fixed using PFA. A | LBPA was visualized using an LBPA antibody. Scale bar indicates 20  $\mu$ m. B | Mean LBPA intensity was quantified (ctrl: n = 4 cells, PDMP: n = 13 cells, NB-DNJ: n = 6 cells) and presented as boxplots. Center lines show median, box limits indicate first (Q1) and third quartiles (Q3), whiskers extend to maximum distance of 1.5\*IQR (interquartile range) from Q1 and Q3, respectively or to the most extreme data point

within that range. Welch two sample t-tests were performed between control and PDMP or NB-DNJ (ctrl-PDMP: \*\*\*  $P = 4.4 \times 10^{-4}$ , ctrl-NB-DNJ: N.S.  $P = 7.9 \times 10^{-1}$ ). C| WT cells were treated with PDMP (20  $\mu$ M, 22 h) or NB-DNJ (50  $\mu$ M, 22 h), fixed and stained using 50  $\mu$ g/mL filipin. Scale bar indicates 20  $\mu$ m. D| Mean filipin intensity was calculated for each cell (ctrl: n = 33 cells, PDMP: n = 34 cells, NB-DNJ: n = 33 cells) and presented as boxplots. Center lines show median, box limits indicate first (Q1) and third quartiles (Q3), whiskers extend to maximum distance of 1.5\*IQR (interquartile range) from Q1 and Q3, respectively or to the most extreme datapoint within that range. Welch two sample t-tests were performed between control and PDMP or NB-DNJ (ctrl-PDMP: \*\*\*\*  $P = 1.4 \times 10^{-10}$ , ctrl-NB-DNJ: N.S.  $P = 2.7 \times 10^{-1}$ ).

Figure S5

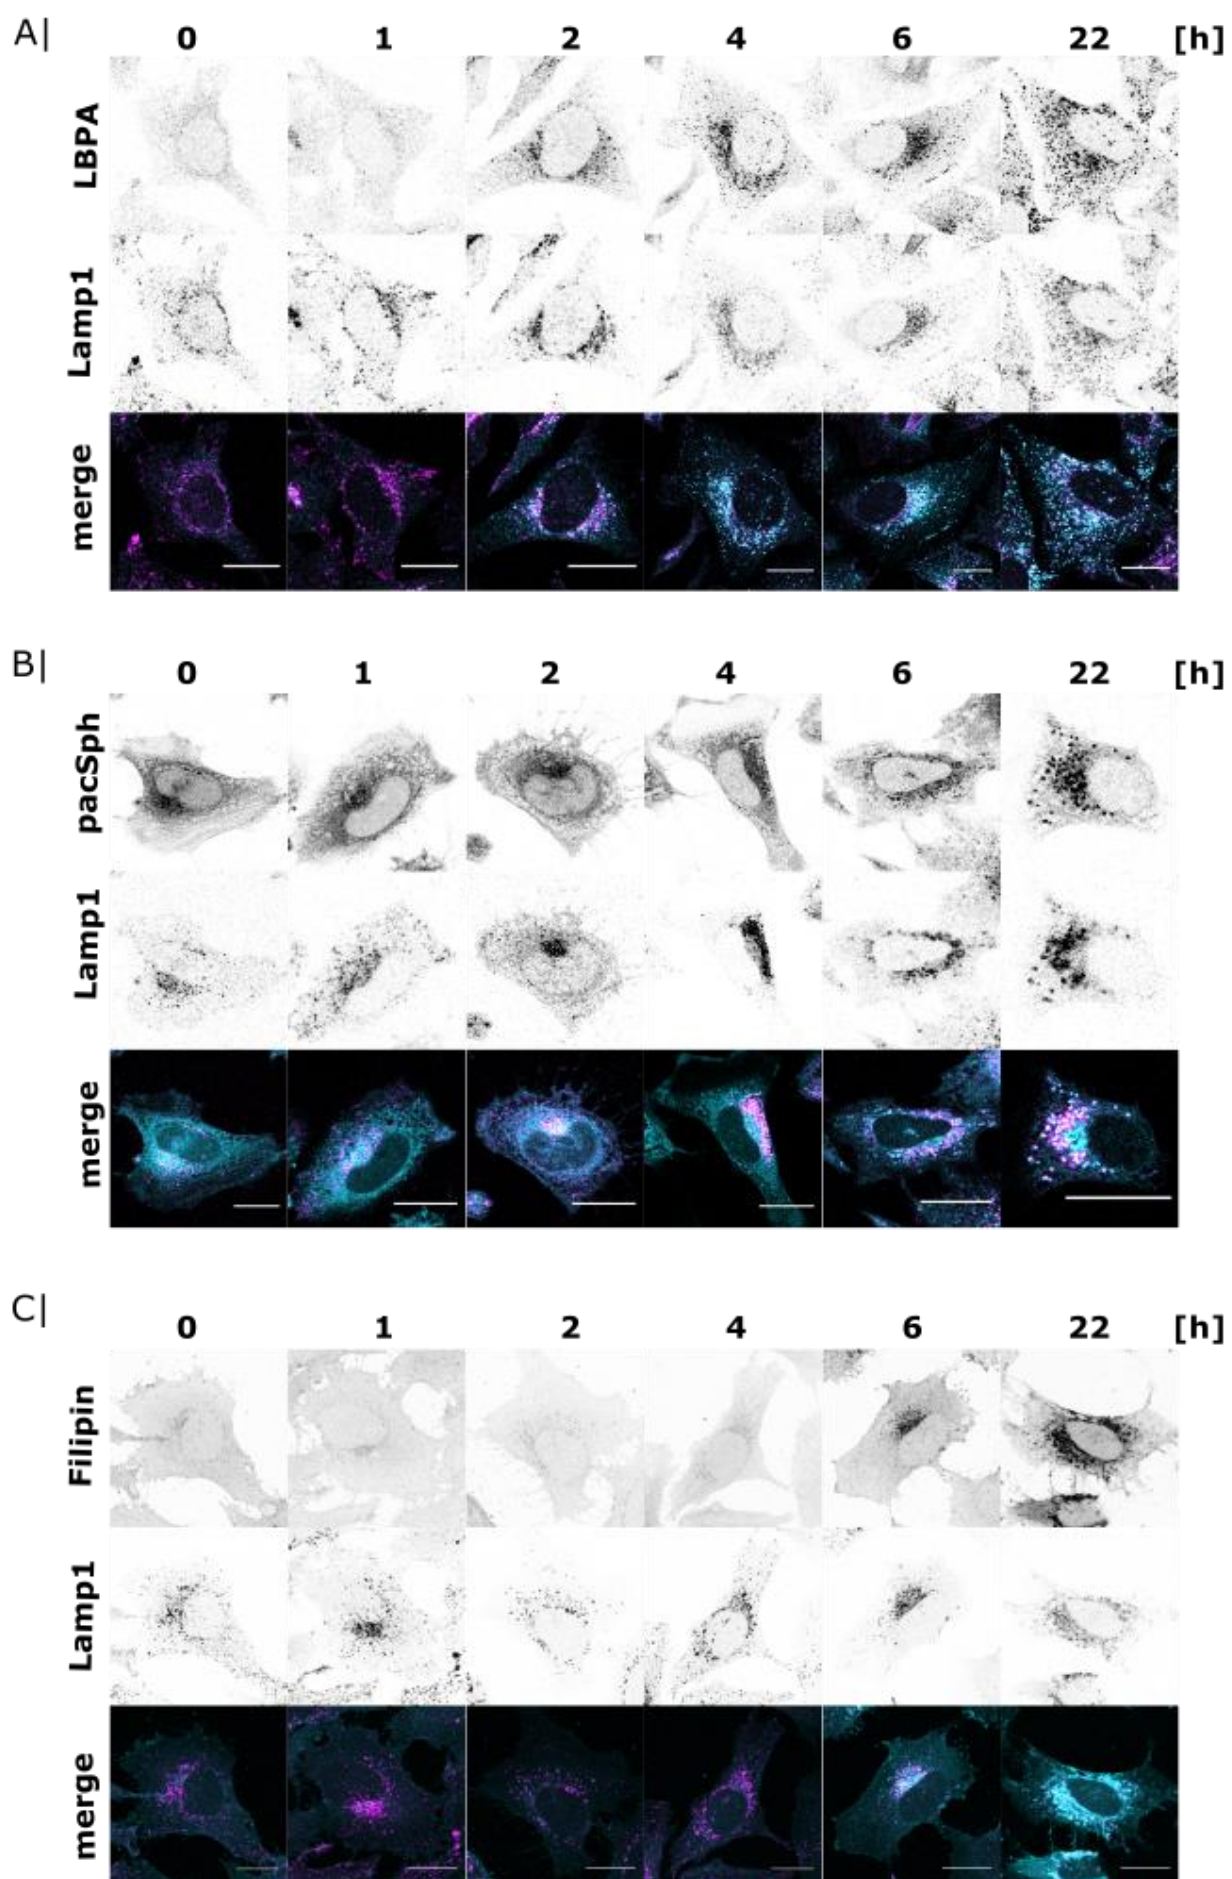

**Figure S5:** PDMP timecourse and its effect on lysosomal lipid accumulation. A| HeLa WT cells were treated with PDMP (20  $\mu$ M) for 0 - 22 h, fixed with PFA and stained using LBPA and Lamp1 antibodies, respectively. B| Confocal microscopy images



of sphingolipids and lysosomes. HeLa SGPL1<sup>-/-</sup> cells were treated with PDMP (20  $\mu$ M for 0 – 22 h), pulsed with pacSph (2  $\mu$ M for 5 min) and afterwards chased for 15 min in medium without lipids. Subsequently sphingolipids were crosslinked by UV-irradiation and cells were methanol fixed. Crosslinked pacSph was clicked to Alexa555-azide and lysosomes were visualized using immunofluorescence staining against Lamp1. C| Confocal microscopy images of HeLa WT cells treated with PDMP (20  $\mu$ M for 0 – 22 h), PFA fixed and stained with 50  $\mu$ g/mL filipin followed by immunofluorescence staining using Lamp1 antibody. Scale bar indicates 20  $\mu$ m.

**Figure S6**

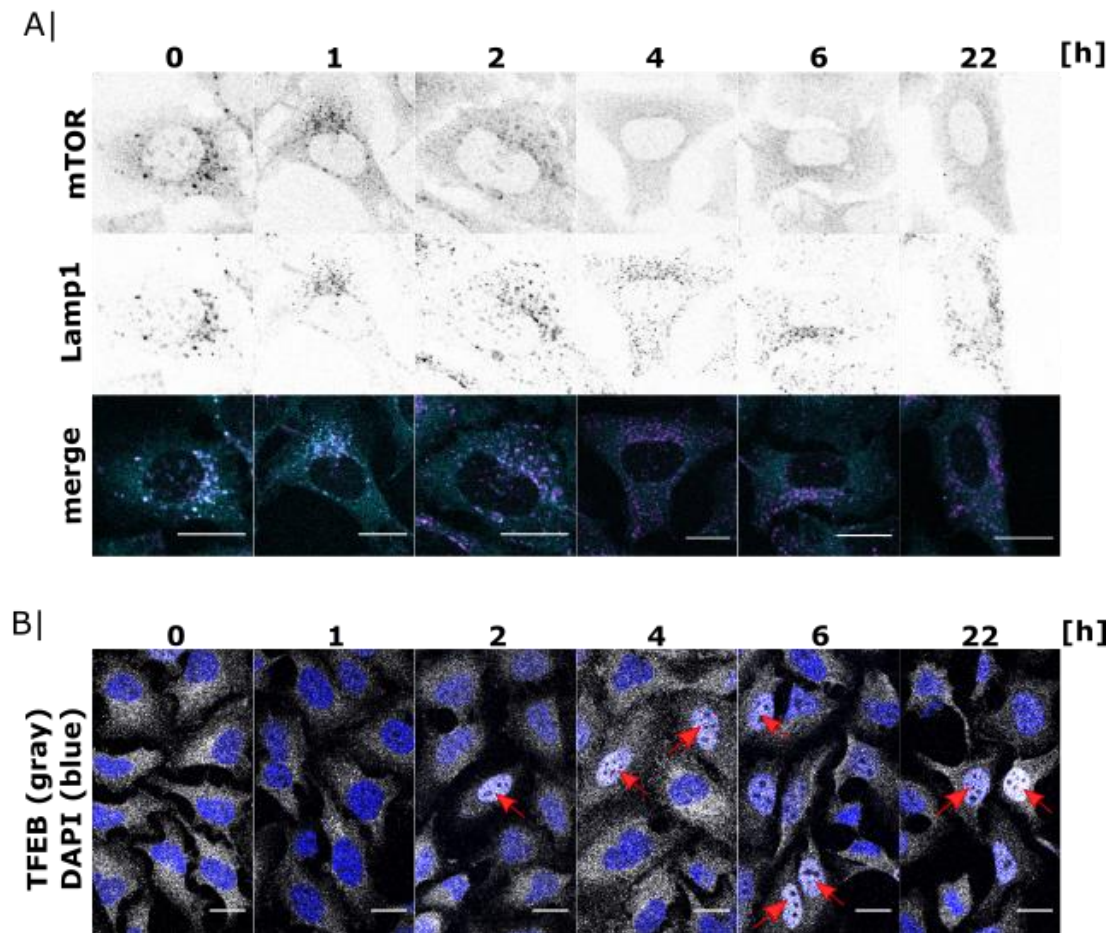

**Figure S6:** PDMP time-course and its effect on mTOR and TFEB translocation. A| HeLa WT cells were treated with PDMP (20  $\mu$ M) for 0 - 22 h, fixed with PFA and stained using a mTOR-antibody. Co-localization with lysosomes was achieved by Lamp1 antibody staining. B| HeLa WT cells were treated with PDMP (20  $\mu$ M) for 0 - 22 h, fixed with PFA and stained using a TFEB antibody (gray). For colocalization with the nucleus, cells were stained with DAPI (blue). Red arrows illustrate cells with nuclear localization of TFEB. Scale bar indicates 20  $\mu$ m.
